# Supplementary material
Source: PubMed Central journal article supplement (PMC5771501)

## Figure Legends

Figure 1. Receiver Operator Curve analysis of the performance of serum kisspeptin and serum hCG.

Figure 2. Box Plot comparing serum and plasma kisspeptin values in patients with intrauterine pregnancies (IUP) and miscarriage (SAB).

Supplemental Figure 1. Scatter plot of linear regression of LoghCG levels compared to Logkisspeptin levels in SAB compared to IUP.

Supplemental Figure 2. Box Plot comparing kisspeptin values in patients who went on to have normal pregnancies (IUP) compared to patients with miscarriage (SAB).

## Tables

**Table 1** Characteristics of Participants with IUP, SAB, and Non-pregnant patients

| Characteristics                       | IUP (n=20)     | SAB (n=20)       | Non-pregnant (n=19) | Total (n=59)   | p value |
|---------------------------------------|----------------|------------------|---------------------|----------------|---------|
| Gestational age (days), mean $\pm$ SD | 68.1 $\pm$ 9.9 | 52.7 $\pm$ 10.0* | N/A                 | N/A            | <0.001  |
| Race, n (%)                           |                |                  |                     |                | <0.001  |
| African American                      | 12 (60.0)      | 12 (60.0)        | 3 (15.8)            | 27 (45.8)      |         |
| Caucasian                             | 0 (0)          | 4 (20.0)         | 12 (63.2)           | 16 (27.1)      |         |
| Asian                                 | 1 (5.0)        | 2 (10.0)         | 3 (15.8)            | 6 (10.2)       |         |
| Other                                 | 7 (35.0)       | 2 (10.0)         | 1 (5.3)             | 10 (17.0)      |         |
| Ethnicity, n (%)                      |                |                  |                     |                | 0.23    |
| Hispanic                              | 3 (15.0)       | 2 (10.0)         | 0 (0)               | 5 (8.47)       |         |
| Non-Hispanic                          | 17 (85.0)      | 18 (90.0)        | 19 (100.0)          | 54 (91.5)      |         |
| Maternal Age, mean $\pm$ SD           | 27.1 $\pm$ 4.9 | 30.4 $\pm$ 7.1   | 35.5 $\pm$ 3.9      | 30.9 $\pm$ 6.4 | <0.001  |

Note: IUP = intrauterine pregnancy; SAB = spontaneous abortion or miscarriage.

\*n=15

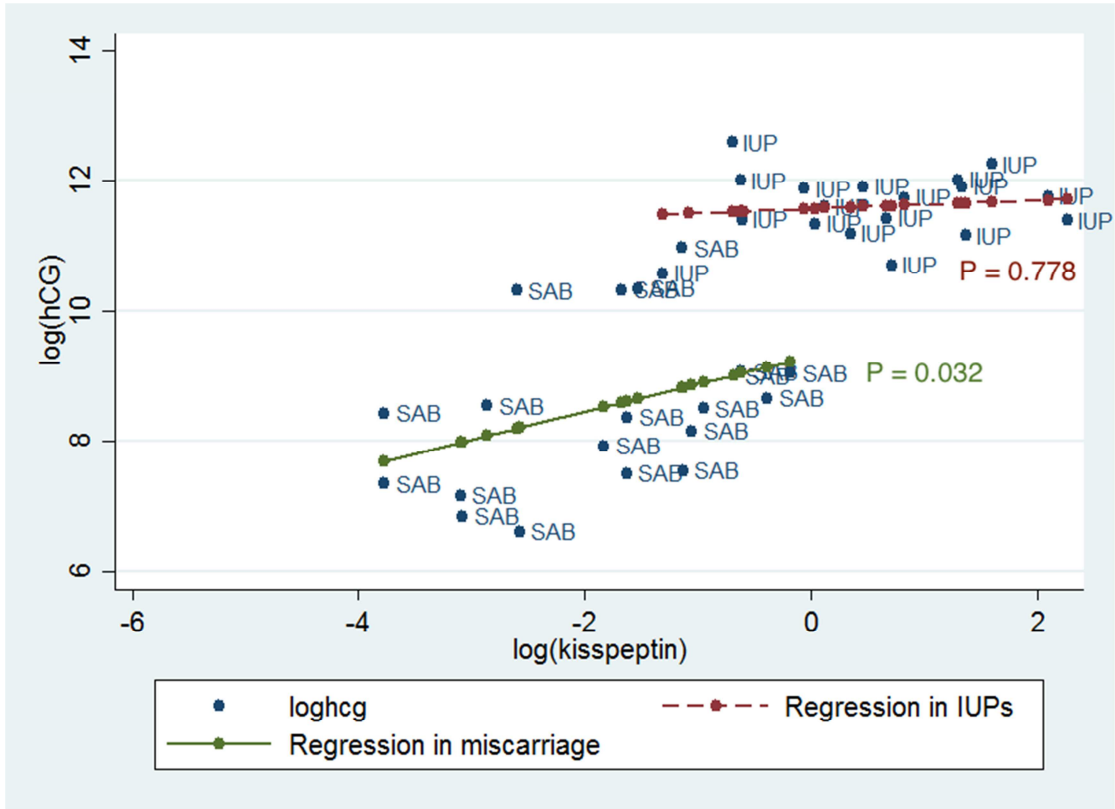

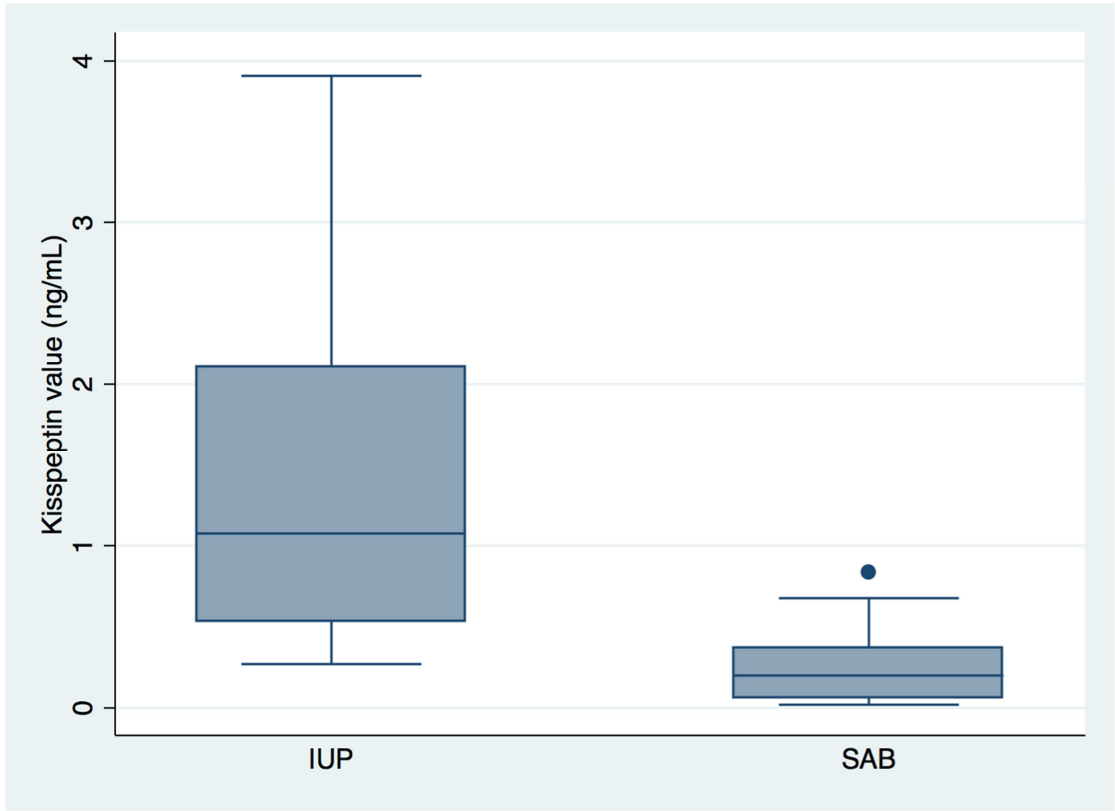

Supplement: NIHMS929527-supplement-supplement_1.pdf [file NIHMS929527-supplement-supplement_1.pdf]
